# Supplementary material for: Trend Assessment of Global, UVB, UVA Irradiation and Dry Bulb Temperature at the Lowest Terrestrial Site on Earth: Dead Sea, Israel
Source: Research Square preprint supplement (doi:10.21203/rs.3.rs-633465/v1), 2021-06-22
Supplement: Supplementary file 1 [file 0b0698acd08b34d11f618cd9.xlsx]

## Sheet: Sheet1
Table 3. Neve Zohar- UVA trends between 1995-2018; average daily global irradiation (Wh/m^2)
Year	Jan (471 d)	Feb (450 d)	Mar (647 d)	Apr (614 d)	May (644 d)	June (630 d)	July (690 d)	Aug (665 d)	Sept (594 d)	Oct (697 d)	Nov (611 d)	Dec (548 d)
1995							377.02	361.13	301.22	229.63	173.79	139.88
1996	143.53	238.08	238.08	303.92	365.03	405.22	373.28	355.05	303.6	219.14	165.38	134.85
1997	146.12	231.41	231.41	297.34	375.77	398.51	388.81	353.15	299.78	246.93	167.66	133.03
1998	139.44	237.37	237.37		361.79	418.51	406.05		304.65	248.77	174.49
1999	145.4	258.83	258.83	319.1	368.02	396.76	392.88	359.81		222.75	180.79	153.04
2000	133.5	251.31	251.31	322.41	400.25	423.28	389.95	364.29	311.34	230.47	176.46
2001		279.31	279.31	311.01	360.32	410.27	398.49	352.59	306.18	209.15	171.46
2002	137.05	239.51	239.51	290.06	375.9	401.38	384.33	355.44	298.38	227.74	156.59	119.86
2003		211.6	211.6	288.53	339.54	395.66	386.43	350.45	303.57	211.92	167.59	130.45
2004		247.2	247.2	305.45	335.62	391.15	376.26	346.31	294.7	221.65	146.72	134.37
2005		244.24	244.24	286.73	347.61	384.35	379.24	344.05	289.32	226.16	154.82	136.96
2006		261.19	261.19	290.21	378.67	410.64	397.81	364.22	305.33	222.06	170.14	132.27
2007	149.21	228.1	228.1	293.8	335.75	396.99	385.81	356.34	292.02	223.97	178.48
2008	134.07	267.09	267.09	320.73	390.08	412.3	405.1	353.77	292.31	217.27	175.36	138.64
2009	154	251	251	304.9	347.15	406.32	393.96	360.08	296.52	228.92
2010	153.26	250	250	312.53	354.82	393.21	387.37	355.84	296.08	228.91	177.72	135.36
2011	138.95	260.36	260.36		349.32	402.03	386.37	353.43	296.62		164.66	138.83
2012	130.25	226.79	226.79		344.21					223.36		118.65
2013	130.96	242.96	242.96	297.31	312.87	379.23	376.83	349.14	279.15	206.68		131.17
2014		214.78	214.78	287.06	381.07	363.97	368.6	337.49	278.93	195.11	152.7	137.72
2015	115.79	258.7	258.7	323.45		397.32	402.69	352.96	259.18	238.81	147.06
2016	143.46	200.77	251.6	326.48	423.32	404.8	406.69	353.66	316.56	238.18	160.62	137.79
2017	145.91	186.64	259.7	308.38	380.06	403.34	370.12	349.11	293.3	233	165.2	120.66
2018	131.92	169.6	280.52	305.56	250.8	417.48	399.86	360.09	283.6	216.81	169.05	136.7
Average	139.578	237.254	247.463	304.748	358.09	400.578	388.433	354.018	295.561	224.669	166.511	133.902
Median	139.44	242.96	250	305.175	361.055	401.705	387.37	353.715	296.57	223.97	167.66	135.105
Stdev	9.66735	26.3601	17.8393	13.1147	34.295	13.464	11.6505	6.45921	12.4404	12.4388	10.125	8.14142
Cv%	6.92614	11.1105	7.20887	4.30346	9.57722	3.36114	2.99937	1.82454	4.2091	5.53648	6.08067	6.08015
Max	154	279.31	280.52	326.48	423.32	423.28	406.69	364.29	316.56	248.77	180.79	153.04
Min	115.79	169.6	211.6	286.73	250.8	363.97	368.6	337.49	259.18	195.11	146.72	118.65
p	0.295	0.024	0.333	0.528	0.261	0.283	0.733	0.184	0.014	0.348	0.13	0.322
