# Supplementary material for: Trend Assessment of Global, UVB, UVA Irradiation and Dry Bulb Temperature at the Lowest Terrestrial Site on Earth: Dead Sea, Israel
Source: Research Square preprint supplement (doi:10.21203/rs.3.rs-633465/v1), 2021-06-22
Supplement: Supplementary file 2 [file 2bdd24371e960a6ab3f1c1dd.xlsx]

## Sheet: Sheet1
Table 1. Neve Zohar- Global trends between 1995-2020; average daily global irradiation (Wh/m^2)
Year	Jan (790 d)	Feb (779 d)	Mar (791 d)	Apr (735 d)	May (789 d)	June (724 d)	July (765 d)	Aug (764 d)	Sept (782)	Oct (788 d)	Nov (718 d)	Dec (764 d)
1995	3612.5	4027.7	5700.7	6330.6	7416.3	7954	7621.6	7204.6	6095.7	4769.9	3690.3	2989.9
1996	3022.3	3791.2	4802.6	6407.7	7374.8	8060.9	7440.1	7117.1	6178.9	4923.9	3649.7	2998.8
1997	3136.3	4075	5047.3	6418.3	7676.1	7942.6	7792.9	7208.6	6189.2	4539.3	3657.1	2835.2
1998	2957.8	4237.4	5009.1	6537.6	6712.5	7951.6	7748.4	6938.8	6115.8	4959.5	3606.1	2925.3
1999	3151	3807.9	5541.6	6696.5	7455.1	7790.1	7694	7034.1	6251	4812.9	3635.1	3129.3
2000	2528	4039.9	5498.6	6450.1	7806.6	8126.1	7488.6	6906.4	5954.5	4337.9	3540.9
2001	3261.7	4049.5	5697.4	6220.7	7133.2	8056.7	7821.2	6980.5	6175.2	4767.9	3545.6	2893
2002	3168.4	4128.3	4520.1	5883.7	7559.1	7976.2	7658.6	7058.1	6066.6	4437.8	3460.9	2651.6
2003	3056.4	3692.5	5507.9	6323.4	7482	8301.2	8077.3	7361.4	6411.8	4864.1	3715.8	2923.7
2004	2878.5	4070	5294.4	6664.6	7168.5	8063.6	8063.1	7366.6	6400.4	4672.7	3320.2	3056.1
2005	3211.2	3902.2	5308.1	6219.4	7369.6	7904.3	7988.6	7251.1	6330.6	4960.3	3472.8	2976.6
2006	2955.9	3678	5487.3	5922.7	7511.3	7953.2	7883.6	7185.7	6208.7	4667.4	3665	3063.4
2007	3285	3803.5	4907.2	6141.8	6783.5	7772.3	7736.2	7175.6	5954.3	4705.4	3695	3168.3
2008	2912.2	3984.9	5586.2	6651.1	7573.3	7985.1	8001.7	7118.2	5922.4	4563.4	3687	3098.1
2009	3410.6	4016.1	5462.5	6169.3	7125.9	8073.7	7780.6	7198	5953	4560.8	3556.1	2934
2010	3174.8	3938.2	5253.4	6610.7	7237.5	7773.6	7688.6	6991.8	5875.7	4714.9	3730.6	2945.3
2011	3174.8	3647	5570	6220.3	7164.3	7990.3	7816.7	7082.2	6030.8	4839.4	3465.5	3058.9
2012	3057.2	3784	4960.8	6587.8	7272.8	7810.5	7689.3	7104.8	6133.1	4605		2975
2013	2940.3	4157.6	5397.6	6575.5	7322.9	7972.4	7819.1	7248.6	6207.2	5021.5		2690.6
2014	3362.8	4361.1	4943.9	6690.8	7024.2	7790.6	6696.6	7139.6	6186.1	4697.8	3388	3033.6
2015	2901.6	3946.9	5309.2	6494.4	7399.3	7629.4	7766.1	6912.4	5404.5	4278.4	3274.5	3067.4
2016	3042.6	4206	5139.5	6582.8	7287.9	7946.3	7838.2	6699.8	6264.5	4927.3	3446	2951.2
2017	3136.1	4077.8	5378.6	6488.4	7594	7966.5	7478	7007.6	5966.6	4834.7	3592.4	2612
2018	2843.9	3866.2	5673.3	6194.8	6542		7723.2	6938.3	5770.7	4514.9	3493.4	2818.1
2019	3207.1	3922.1	4798.9	6319.6	7400.9	7646.5	7822.6	7062.2	6130.9	4707.7	3694.8
2020	2705.3	3842.3	4723.2		7471.4	7866.7	7579	6947.2	5778	4740.6	3478.7	3019.6
Average	3080.55	3963.59	5250.75	6392.1	7302.5	7932.18	7719.77	7086.13	6075.24	4708.67	3560.9	2950.62
Median	3096.65	3965.9	5308.65	6418.3	7372.2	7953.2	7757.25	7093.5	6123.35	4711.3	3574.25	2975.8
Stdev	225.873	180.172	333.467	228.857	294.151	149.968	265.593	152.002	218.434	191.163	128.496	143.649
Cv%	7.33222	4.54569	6.35084	3.5803	4.02809	1.89063	3.44042	2.14506	3.59548	4.05981	3.60853	4.86843
Max	3612.5	4361.1	5700.7	6696.5	7806.6	8301.2	8077.3	7366.6	6411.8	5021.5	3730.6	3168.3
Min	2528	3647	4520.1	5883.7	6542	7629.4	6696.6	6699.8	5404.5	4278.4	3274.5	2612
p-value	0.373	0.996	0.52	0.604	0.361	0.02	0.569	0.101	0.032	0.746	0.109	0.581
